# Supplementary figures and images for: IIV-6 Inhibits NF-κB Responses in Drosophila
Source: MDPI journal article supplement (doi:10.3390/v11050409), 2019-05-01

# *Drosomycin*

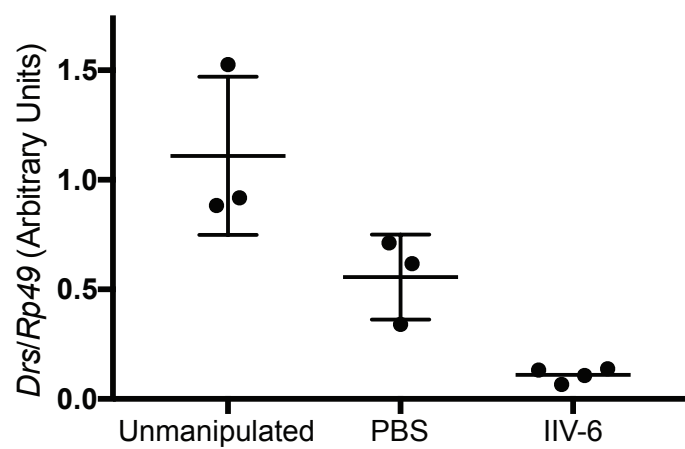

Supplement: s1 [file s1]

*GAPDH1*

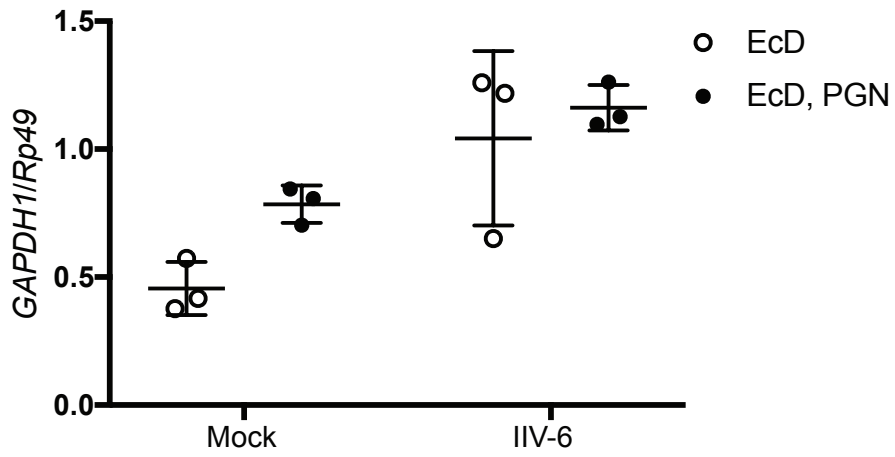

Supplement: s1 [file s1]
